# Supplementary material
Source: Springer Nature journal article supplement (https://www.springermedizin.de/resource/supplementary/12955_2005_221_MOESM2_ESM.pdf/9559932)
Supplement: MOESM2 [file 9559932]

Condition-specific<sup>\*</sup>

Chronic generic<sup>\*</sup>

Generic<sup>†</sup>
